# Supplementary material for: Modulation of intramolecular Fe oxidation with distance and driving force in Ru–Fe photocatalysts
Source: Royal Society of Chemistry journal article supplement (doi:10.1039/d4nj02755h), 2024-01-01
Supplement: d4nj02755h1.pdf [file d4nj02755h1.pdf]

### SUPPLEMENTARY INFORMATION

#### Electrochemical measurements

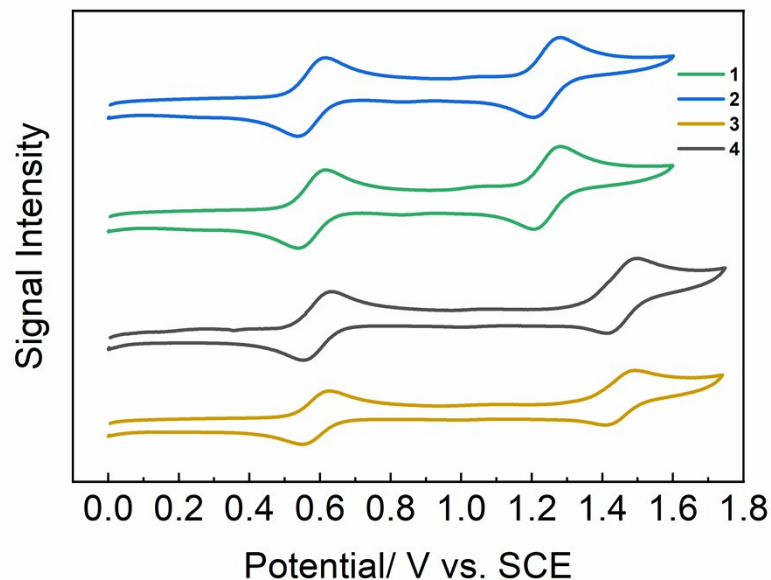

Figure S1. Electrochemical measurements for dyads in  $\text{H}_2\text{O}/\text{CH}_3\text{CN}$  (4:1), 0.1 M tetrabutylammonium hexafluorophosphate

#### $[\text{Fe}^{\text{II}}(\text{L}_5^2)\text{Cl}]^+$ catalyst excited state

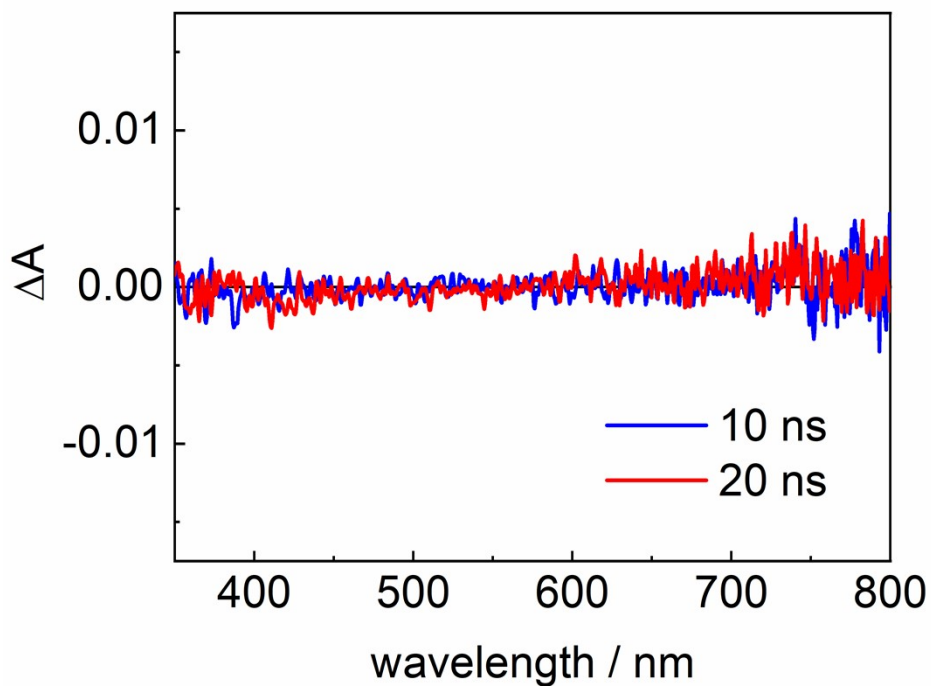

Figure S2. Transient absorption of  $[\text{Fe}^{\text{II}}(\text{L}_5^2)\text{Cl}]^+$  catalyst. Excitation at 355 nm. Laser energy: 8 mJ.  $A_{355} = 0.20$ . Solvent:  $\text{CH}_3\text{CN}$

## Emission kinetic analysis

Emission values given in Table 2 have been obtained fitting the experimental decays with the biexponential decay equation given below:

$$A = A_1 e^{-t/\tau_1} + A_2 e^{-t/\tau_2}$$

The values  $\tau_1$  and  $\tau_2$  have been reported in Table, together with percentages calculated as

$$\frac{A_1}{A_1 + A_2} \times 100$$

and

$$\frac{A_2}{A_1 + A_2} \times 100$$

## Chromophore-catalyst complexes gated emission spectra

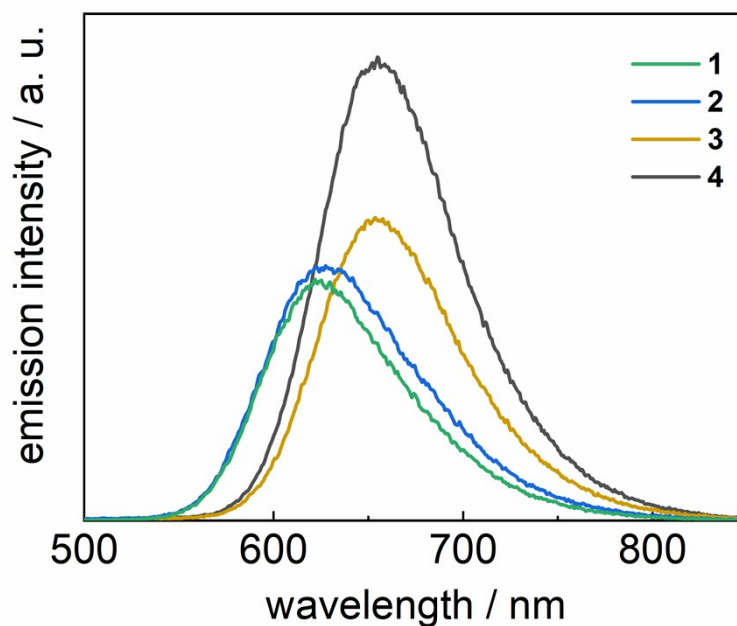

Figure S3. Gated (gate = 10 ns) emission spectra for the different dyads, obtained 10 ns after excitation with 460 nm laser pulse (10 mJ energy) in a H<sub>2</sub>O/CH<sub>3</sub>CN (4:1) mixture.

## Transient absorption kinetics

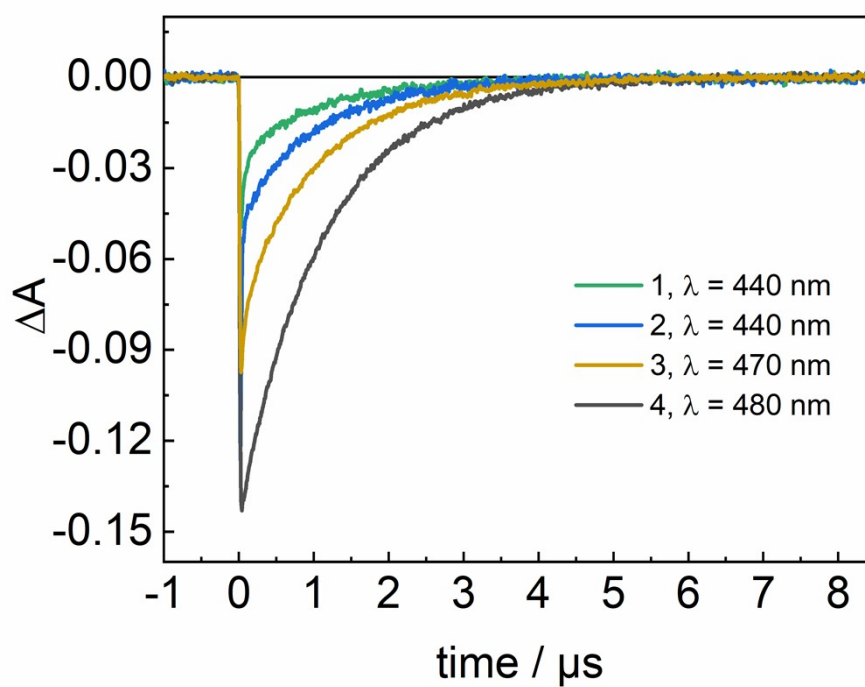

Figure S4. Transient kinetics obtained for the dyads at indicated wavelengths in  $\text{H}_2\text{O}/\text{CH}_3\text{CN}$  (4:1). Optically matched absorption at 460 nm ( $A_{460} = 0.40$ ). Size of the signals agree with the excited state lifetimes

## PET in the presence of 20 mM MV<sup>2+</sup>

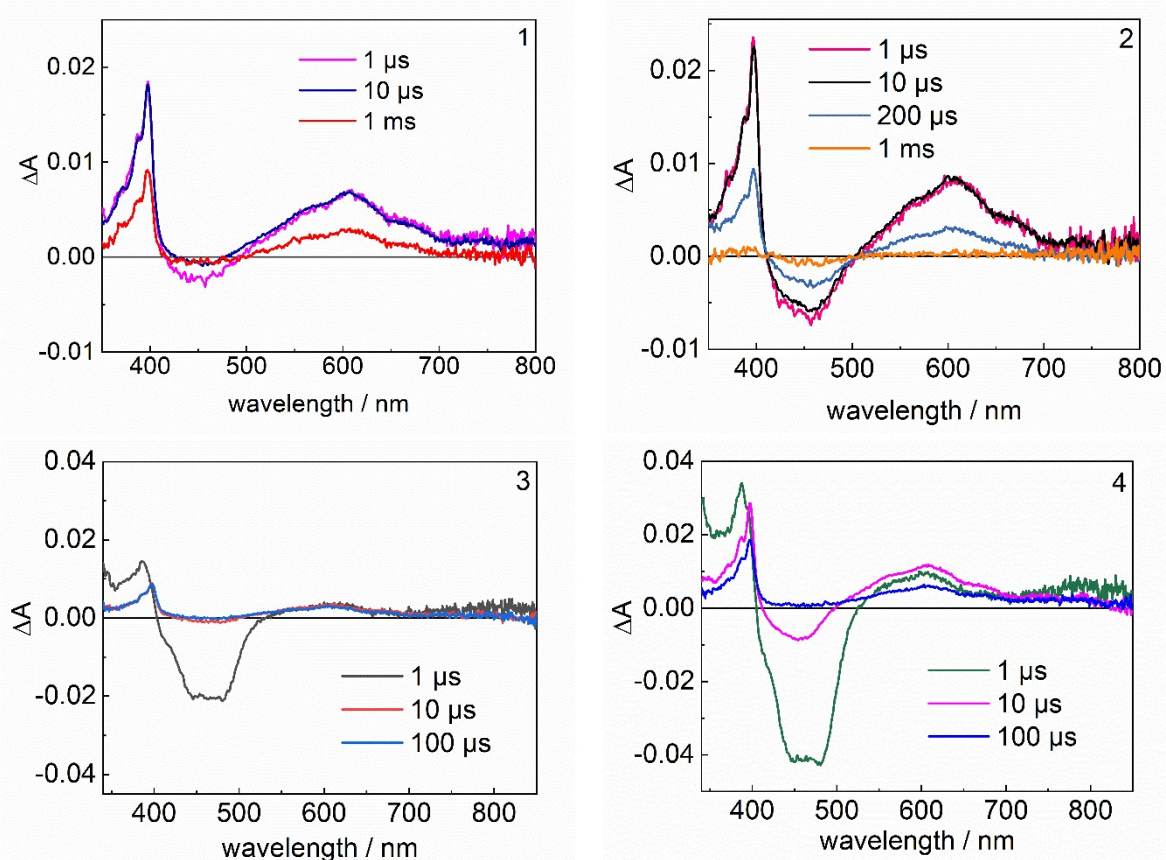

Figure S5. Differential transient absorption spectra in the presence of 20 mM MV<sup>2+</sup> for the different compounds in H<sub>2</sub>O/CH<sub>3</sub>CN (4:1) argon-purged solution. Solutions excited at 460 nm with a laser energy ~10 mJ, absorption at excitation wavelength: 0.40

## Simulations

All the parameters resulting from simulations are given in the table below:  $k_{ET}$  is the rate constant for interaction with MV<sup>2+</sup>,  $k_{IET}$  is the rate for Fe<sup>II</sup> oxidation,  $k_{IET1}$  the recombination rate between MV<sup>•+</sup> and Ru<sup>III</sup>, while  $k_{IET2}$  is that between MV<sup>•+</sup> and Fe<sup>II</sup>.  $\Phi_{IET}$  is the yield for the intramolecular oxidation of Fe<sup>III</sup>, obtained as the ration of Fe<sup>III</sup> maximum concentration over the Ru<sup>III</sup> concentration.

| Compound | $k_{ET} / \text{M}^{-1} \text{s}^{-1}$ | $k_{IET} / \text{s}^{-1}$ | $k_{REC1} / \text{M}^{-1} \text{s}^{-1}$ | $k_{REC2} / \text{M}^{-1} \text{s}^{-1}$ | $\Phi_{IET}$ |
|----------|----------------------------------------|---------------------------|------------------------------------------|------------------------------------------|--------------|
| <b>1</b> | $3.2 \times 10^8$                      | 3100                      | $2.2 \times 10^9$                        | $2.3 \times 10^9$                        | 0.55         |
| <b>2</b> | $3.2 \times 10^8$                      | 620                       | $2.0 \times 10^9$                        | $2.0 \times 10^9$                        | 0.24         |
| <b>3</b> | $3.5 \times 10^7$                      | 11000                     | $2.7 \times 10^9$                        | $2.4 \times 10^9$                        | 0.87         |
| <b>4</b> | $3.5 \times 10^7$                      | 8300                      | $2.6 \times 10^9$                        | $2.3 \times 10^9$                        | 0.75         |

Table S1. Summary of the simulations results.

## Fits results

### Complex 1

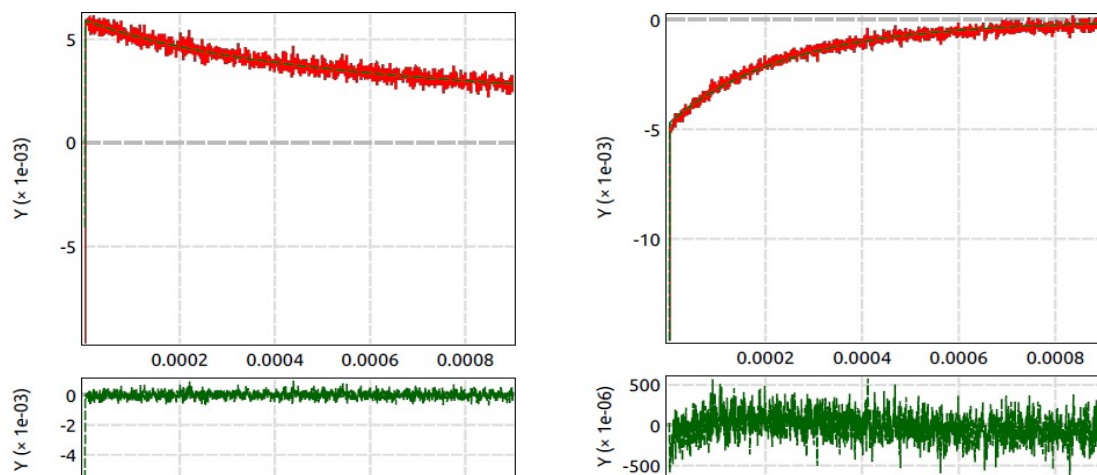

Figure S6. Global fit obtained for complex 1: left, 605 nm; right 450 nm

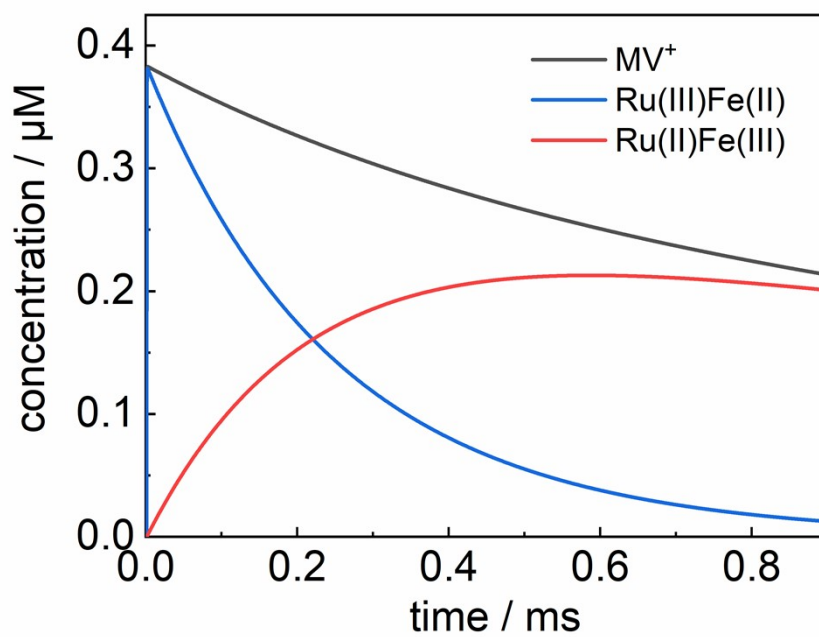

Figure S7. Time-evolution of concentration of different species for 1 and  $\text{MV}^{2+}$

## Complex 2

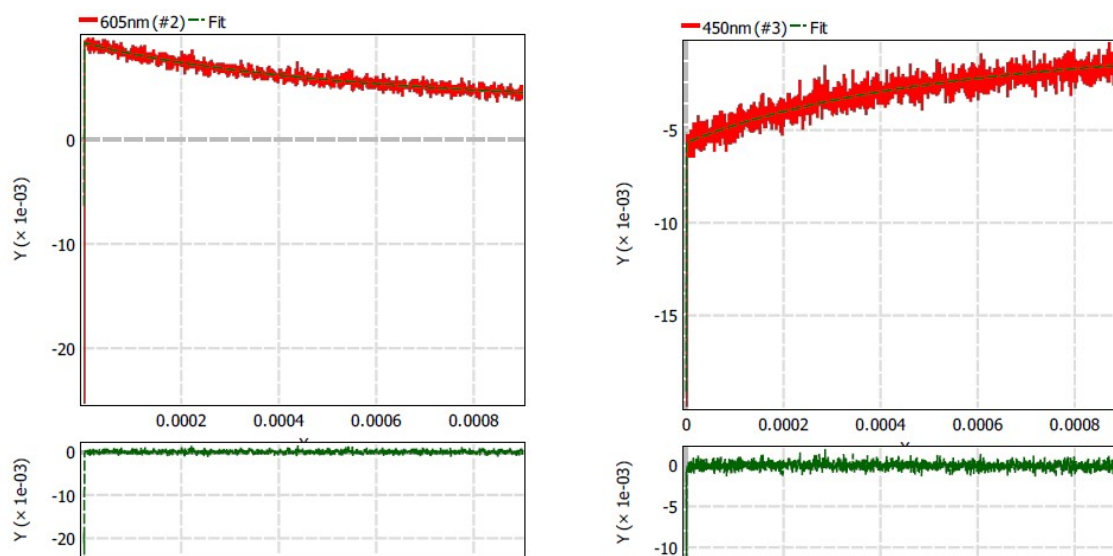

Figure S 8. Global fit obtained for complex 2: left, 605 nm; right 450 nm

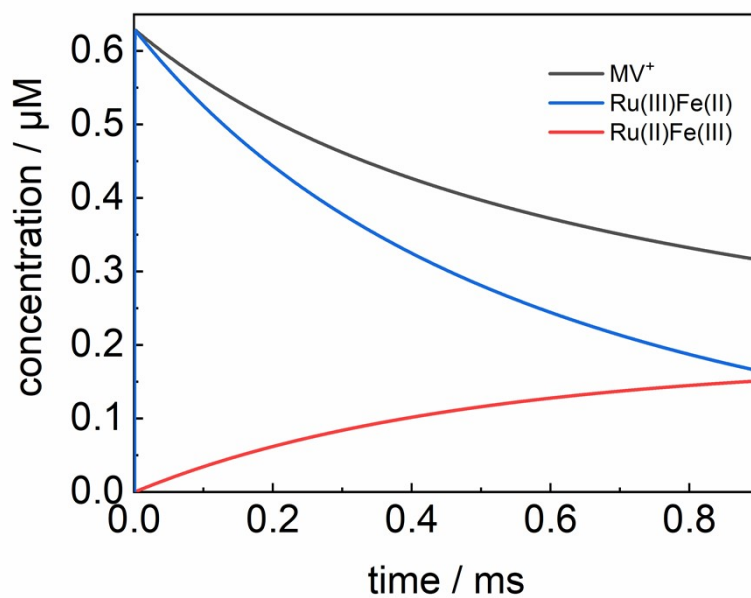

Figure S 9. Time-evolution of concentration of different species for 2 and  $MV^{2+}$

### Complex 3

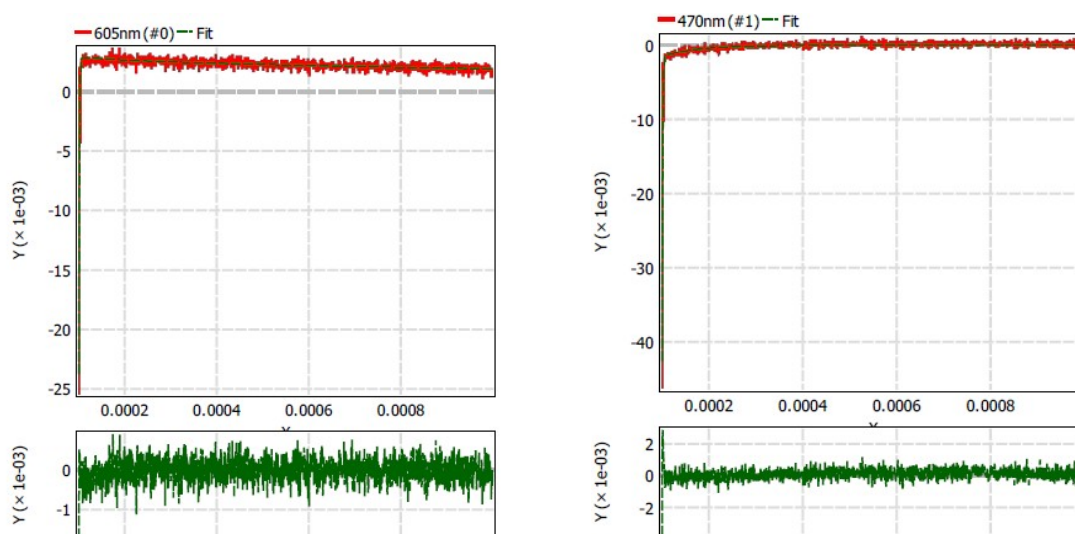

Figure S10. Global fit obtained for complex 3: left, 605 nm; right 470 nm

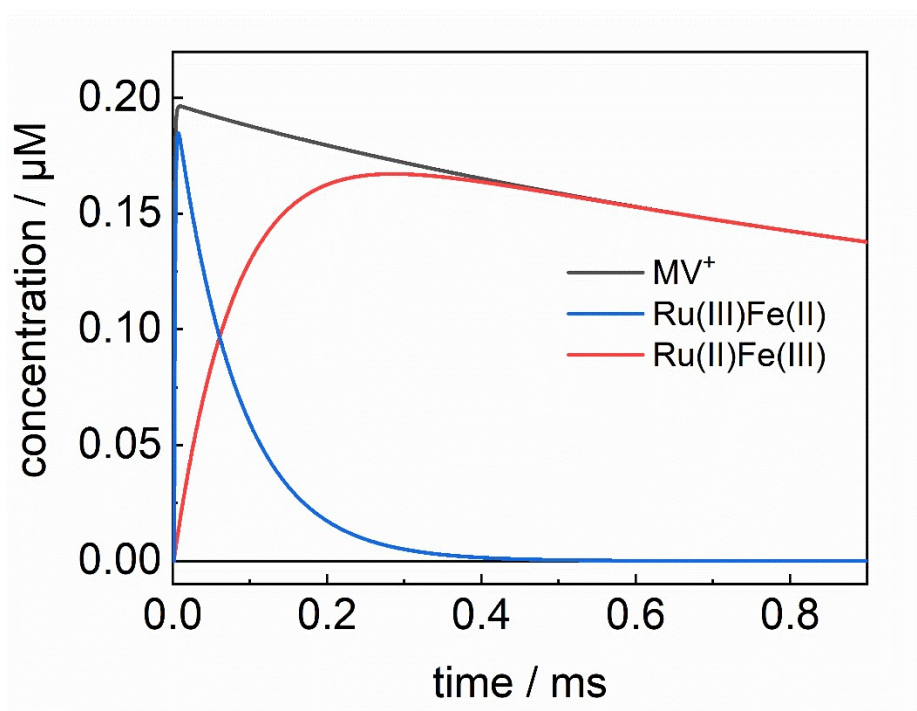

Figure S11. Time-evolution of concentration of different species for 3 and MV<sup>2+</sup>

### Complex 4

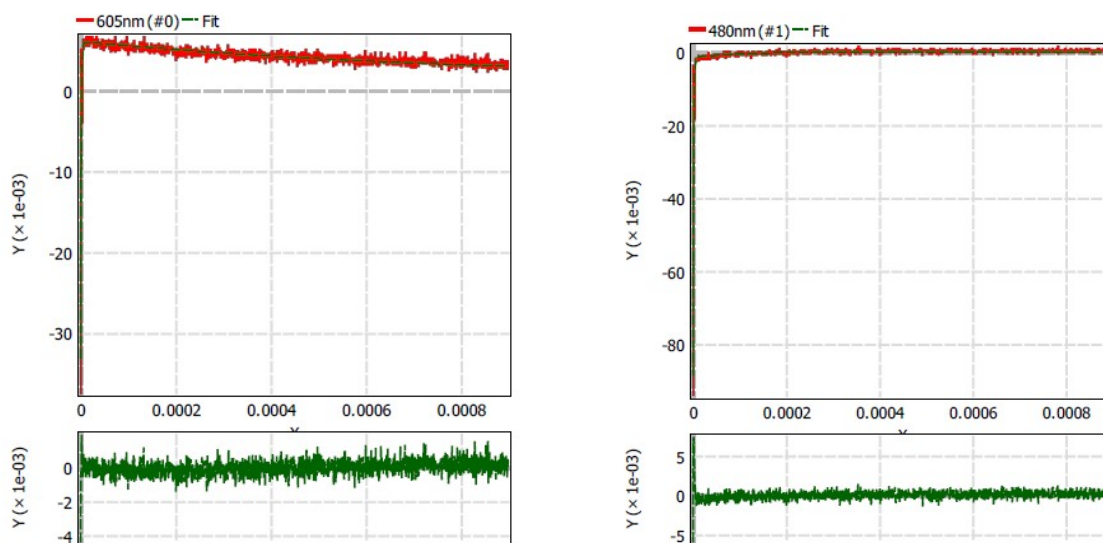

Figure S12. Global fit obtained for complex 4: left, 605 nm; right 480 nm

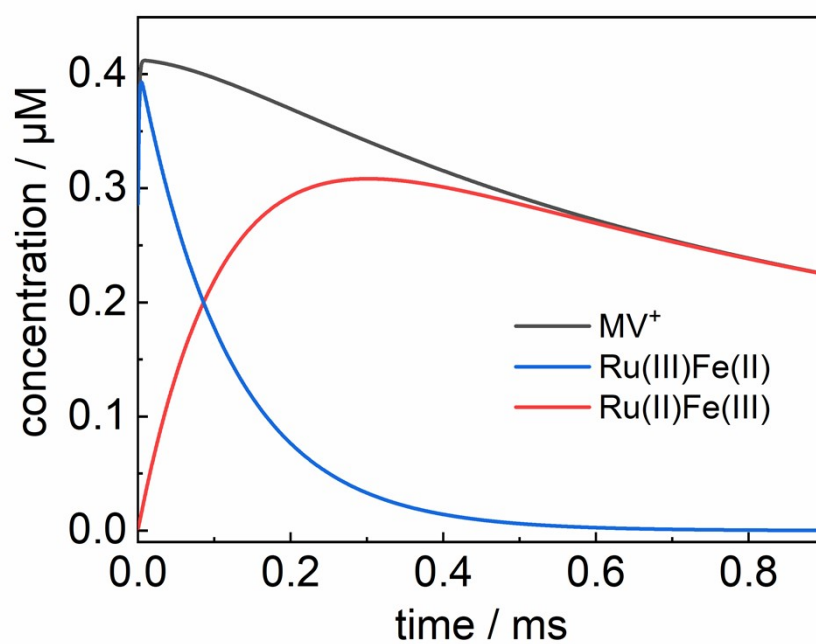

Figure S13. Time-evolution of concentration of different species for 4 and  $\text{MV}^{2+}$



## Activation energy plots

Values of  $\lambda$  and  $H_{AB}$  have been obtained from Marcus equation<sup>16</sup>

$$k_{IET} = \frac{2}{\hbar} H_{AB}^2 \frac{1}{\sqrt{4\pi k_B \lambda T}} \times e^{-\frac{(\Delta G^0 + \lambda)^2}{4\lambda k_B T}}$$

Where  $\hbar$  is the reduced Plank constant ( $6.58 \times 10^{-16}$  eV s<sup>-1</sup>) and  $k_B$  is the Boltzmann constant ( $0.86 \times 10^{-4}$  eV). By plotting  $\ln(k_{IET} \times T^{1/2})$  vs  $1/T$ , the slope of the linear fit corresponds to the activation energy  $E_A$

$$E_A = \frac{(\Delta G^0 + \lambda)^2}{4\lambda k_B}$$

and the intercept to

$$\ln\left(\frac{H_{AB}^2}{\hbar} \sqrt{\frac{4\pi}{\lambda k_B}}\right)$$

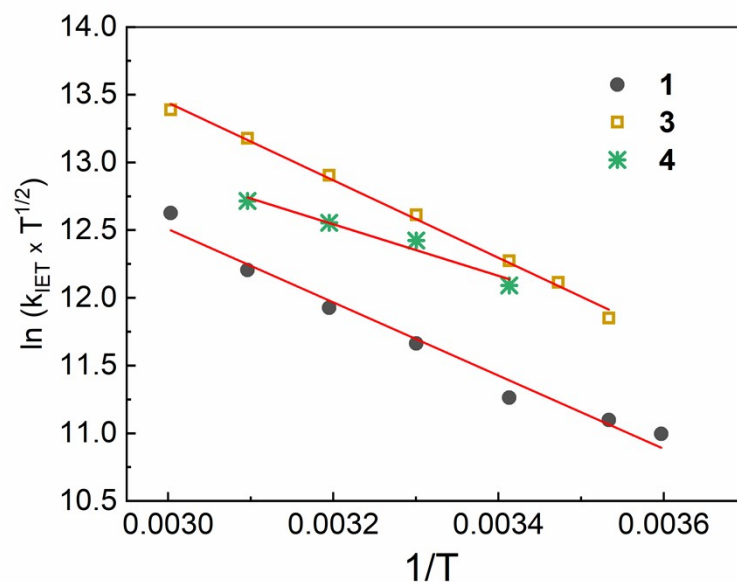

Figure S14. Activation energy plots for complexes **1**, **2** and **4** in H<sub>2</sub>O/CH<sub>3</sub>CN (4:1) in the presence of 20 mM MV<sup>2+</sup>
